# Supplementary material
Source: ML conference proceedings conference paper supplement (https://openaccess.thecvf.com/content/WACV2023/html/Vanderschueren_Are_Straight-Through_Gradients_WACV_2023_paper.html)
Supplement: Supplementary file 1 [file Vanderschueren_Are_Straight-Through_Gradients_WACV_2023_supplemental.pdf]

# Appendix for: Are Straight-Through gradients and Soft-Thresholding all you need for Sparse Training?

Antoine Vanderschueren  
UCLouvain, Belgium

antoine.vanderschueren@uclouvain.be

Christophe De Vleeschouwer  
UCLouvain, Belgium

christophe.devleeschouwer@uclouvain.be

This appendix contains the following additional information:

1. An additional ablation study on the use of LAMP combined with ST-3
2. The full hyper-parameter list for our training
3. Our  $ST-3^{(\sigma)}$  algorithm in pseudo-code format
4. The numerical values for the ImageNet results

## 1. Comparison to LAMP pruning

Figure 1 repeats the same experiences as Figure 5 in the main text, but with the addition of LAMP instead of l1-based pruning. The conclusions about the usefulness of our added rescaling and soft thresholding remain the same: rescaling is only useful when combined with soft-thresholding. LAMP doesn't show any additional performance increase over traditional l1-based pruning while being more expensive FLOPS-wise. Although not shown on this graph, LAMP, combined with STE alone, has the advantage of not suffering from layer collapse due to its formal definition.

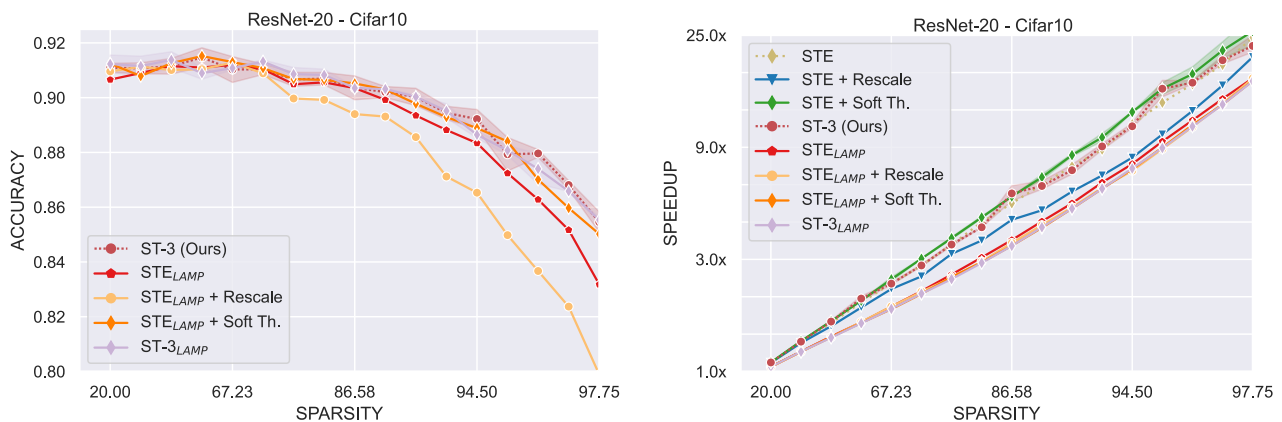

Figure 1. (left) A study dissecting the impact of straight-through estimation, soft-thresholding and weight-rescaling during sparse training with LAMP-based sparse-weight-selection. (right) FLOPS/Sparsity trade-off comparing l1 and LAMP sparse training. A log-scale is used for the x-axes.

## 2. Training parameters

All training configuration files and precise network structures are uploaded made open-source at <https://github.com/vanderschuea/stthree>. A quick rundown is provided below for easy comparison.

### 2.1. Hyper-parameters

These are the hyper-parameters used for our retraining of the following networks. All results on Cifar-10(0) are reported from a train/val/test split of sizes 45k/5k/10k. The results on ImageNet are reported on the validation set.

| Model        | ResNet-20/VGG-11/WideResNet-34x2 | ResNet-50/MobileNetv1 |
|--------------|----------------------------------|-----------------------|
| epochs       | 160                              | 100                   |
| optimizer    | SGD                              |                       |
| lr           | 0.1                              | 0.2                   |
| momentum     | 0.9                              |                       |
| batch-size   | 128                              | 256                   |
| weight-decay | 1e-4                             | see below             |
| lr-decay     | Step-lr@[80,120]                 | cosine-lr (+ warmup)  |
| grad. clip.  | 3.0                              |                       |

Due to the double regularization-effect of pruning and weight-decay, the weight-decay parameter is slowly decreased as follows at different sparsity ratios:

- ResNet50: 1e-4 (80-95), 1e-5 (96.5-98), 0.0 (99)
- MobileNetv1: 1e-4 (80), 1e-5 (89-95)

We do not apply decaying on the weight-decay parameter for the cifar-10(0) models as they don't benefit much from such optimizations.

### 2.2. Augmentations

**Cifar-10(0)** The standard 4x4 padding is applied before a 32x32 crop is taken. The data is normalized and also randomly horizontally flipped.

**ImageNet** Images are randomly cropped and resized to 224x224. The data is normalized and also randomly horizontally flipped. (Test images are resized to 256x256 and a centercrop of size 224x224 is taken for evaluation)

### 3. Pseudo-code

**Algorithm 1** PyTorch-like Pseudo-code for ST-3 <sup>$\sigma$</sup>  without and with Sparsity Distribution Suggestion

```

1: for  $i = 1 \rightarrow n\_epochs$  do
2:   for  $batch = 1 \rightarrow \text{len}(\text{train\_loader})$  do
3:      $sp\_ratio = \text{get\_sp\_ratio}(i, batch)$  ▷ update sparsity ratio
4:      $\text{weights} = \text{torch.tensor}([])$  ▷ aggregate all weights
5:     for  $\text{module in model.modules}$  do
6:        $w = \text{module.weight}$ 
7:        $\text{weights.append}(w.\text{flatten}() * \sqrt{w.\text{shape.sum}()})$ 
8:      $th = \text{weights.abs}().\text{quantile}(sp\_ratio)$ 
9:      $W_{\text{sparse}} = \{\}$  ▷ aggregate sparsified weights
10:    for  $\text{name, module in model.named\_modules}$  do
11:       $mth = th / \sqrt{w.\text{shape.sum}()}$ 
12:      with STE(): ▷ straight-through gradients
13:         $w = \text{module.weight}$  ▷ dense weights
14:         $w_{\text{sparse}} = \text{sign}(w) * (\|w\| - mth).\text{clip}(0)$  ▷ soft-th
15:         $w_{\text{sparse}} *= \text{get\_scale}(w, mth)$  ▷ apply rescaling
16:         $W_{\text{sparse}}[\text{name}] = w_{\text{sparse}}$ 
17:     $\text{inputs} = \text{trainloader}[batch]$ 
18:     $\text{loss} = \text{model}(W_{\text{sparse}}, \text{inputs})$ 
19:     $\text{loss.backward}()$  ▷ + update all dense model weights

```

### 4. Table of results

Below are the exact numerical values used for the graphs presenting the results on ImageNet. The values for the other methods, are taken from their respective papers which use the same training times and data-augmentations. No 'best' values are put in bold as it would depend on whether comparison is made on Accuracy or GFLOPS as the common denominator. For a better understanding, we refer to the figures presented in the paper's main body.

| Method                                     | Accuracy [%] | Sparsity [%] | GFLOPS |
|--------------------------------------------|--------------|--------------|--------|
| GMP                                        | 67.7         | 74.11        | 163    |
| STR                                        | 68.35        | 75.28        | 101    |
| STR                                        | 66.52        | 79.07        | 81     |
| RigL+ERK                                   | 68.39        | 75           | 296    |
| ST-3 <sup><math>\sigma</math></sup> (Ours) | 68.67        | 80           | 135    |
| ST-3 (Ours)                                | 69.1         | 80           | 181    |
| <hr/>                                      |              |              |        |
| STR                                        | 64.83        | 85.8         | 55     |
| GMP                                        | 61.8         | 89.03        | 82     |
| STR                                        | 62.1         | 89.01        | 42     |
| STR                                        | 61.51        | 89.62        | 40     |
| RigL+ERK                                   | 62.33        | 90           | 154    |
| ProbMask                                   | 65.19        | 89           | 63     |
| ST-3 <sup><math>\sigma</math></sup> (Ours) | 66.15        | 89           | 86     |
| ST-3 (Ours)                                | 66.67        | 89           | 119    |
| <hr/>                                      |              |              |        |
| RigL+ERK                                   | 56.27        | 95           | 103    |
| ProbMask                                   | 60.1         | 94.1         | 34     |
| ST-3 <sup><math>\sigma</math></sup> (Ours) | 60.94        | 94.1         | 52     |
| ST-3 (Ours)                                | 61.19        | 94.1         | 74     |

Table 1. Numerical Values for the figures with results on ImageNet w/ MobileNetv1

| Method               | Accuracy [%] | Sparsity [%] | GFLOPS |
|----------------------|--------------|--------------|--------|
| RigL                 | 74.6         | 80           | 940    |
| RigL+ERK             | 75.1         | 80           | 1717   |
| DNW                  | 76           | 80           | 818    |
| GMP                  | 75.6         | 80           | 818    |
| STR                  | 76.19        | 79.55        | 766    |
| STR                  | 76.12        | 81.27        | 705    |
| GraNet               | 76           | 80           | 1431   |
| ST-3 $\sigma$ (Ours) | 76.44        | 80           | 739    |
| ST-3 (Ours)          | 76.95        | 80           | 1215   |
| RigL                 | 72.0         | 90           | 531    |
| RigL+ERK             | 73.0         | 90           | 981    |
| DNW                  | 74           | 90           | 409    |
| GMP                  | 73.91        | 90           | 409    |
| STR                  | 74.73        | 87.7         | 402    |
| STR                  | 74.31        | 90.23        | 343    |
| STR                  | 74.01        | 90.55        | 341    |
| GraNet               | 74.5         | 90           | 818    |
| ProbMask             | 74.68        | 90           | 381    |
| ST-3 $\sigma$ (Ours) | 75.28        | 90           | 397    |
| ST-3 (Ours)          | 76.03        | 90           | 764    |
| RigL                 | 67.5         | 95           | 327    |
| RigL+ERK             | 70           | 95           | 491    |
| DNW                  | 68.3         | 95           | 204    |
| GMP                  | 70.59        | 95           | 204    |
| STR                  | 70.97        | 94.8         | 182    |
| STR                  | 70.4         | 95.03        | 159    |
| STR                  | 70.21        | 95.15        | 162    |
| ProbMask             | 71.5         | 95           | 205    |
| ST-3 $\sigma$ (Ours) | 73.69        | 95           | 219    |
| ST-3 (Ours)          | 74.46        | 95           | 436    |
| RigL                 | 64.5         | 96.5         | 164    |
| RigL+ERK             | 67.2         | 96.5         | 286    |
| STR                  | 67.78        | 96.11        | 127    |
| STR                  | 67.22        | 96.53        | 117    |
| ST-3 $\sigma$ (Ours) | 72.62        | 96.5         | 167    |
| ST-3 (Ours)          | 73.31        | 96.5         | 351    |
| DNW                  | 58.2         | 98           | 82     |
| GMP                  | 57.9         | 98           | 82     |
| STR                  | 62.84        | 97.78        | 80     |
| STR                  | 61.46        | 98.05        | 73     |
| STR                  | 59.76        | 98.22        | 64     |
| ProbMask             | 66.83        | 98           | 105    |
| ST-3 $\sigma$ (Ours) | 69.75        | 98           | 116    |
| ST-3 (Ours)          | 70.46        | 98           | 220    |
| GMP                  | 44.78        | 99           | 41     |
| STR                  | 54.79        | 98.79        | 54     |
| STR                  | 51.82        | 98.98        | 47     |
| STR                  | 50.35        | 99.1         | 44     |
| ProbMask             | 61.07        | 99           | 55     |
| ST-3 $\sigma$ (Ours) | 63.25        | 99           | 69     |
| ST-3 (Ours)          | 63.88        | 99           | 120    |

Table 2. Numerical Values for the figures with results on ImageNet w/ ResNet-50
